# Supplementary material for: Identification of Volatile Organic Liquids by Combining an Array of Fiber-Optic Sensors and Machine Learning
Source: PubMed Central journal article supplement — ACS Omega. 2023 Jan 24;8(5):4597–607. doi: 10.1021/acsomega.2c05451 (PMC9909791; doi:10.1021/acsomega.2c05451), 2023-01-24
Supplement: ao2c05451_si_001.pdf [file ao2c05451_si_001.pdf]

# Identification of volatile organic liquids by combining an array of fiber-optic sensors and machine learning.

Wassana Naku,<sup>†</sup> Anand K. Nambisan,<sup>†</sup> Muhammad Roman,<sup>†</sup> Chen Zhu,<sup>‡</sup> Rex E. Gerald II,<sup>†</sup> and Jie Huang<sup>†,\*</sup>

<sup>†</sup>Department of Electrical and Computer Engineering, Missouri University of Science and Technology, Rolla, MO 65409, USA

<sup>‡</sup>Research Center for Optical Fiber Sensing, Zhejiang Laboratory, Hangzhou 311100, China.

\*Corresponding Author: E-mail: jieh@mst.edu (Jie Huang). Telephone.: +1- 573-341-4836.

## Supporting Figures

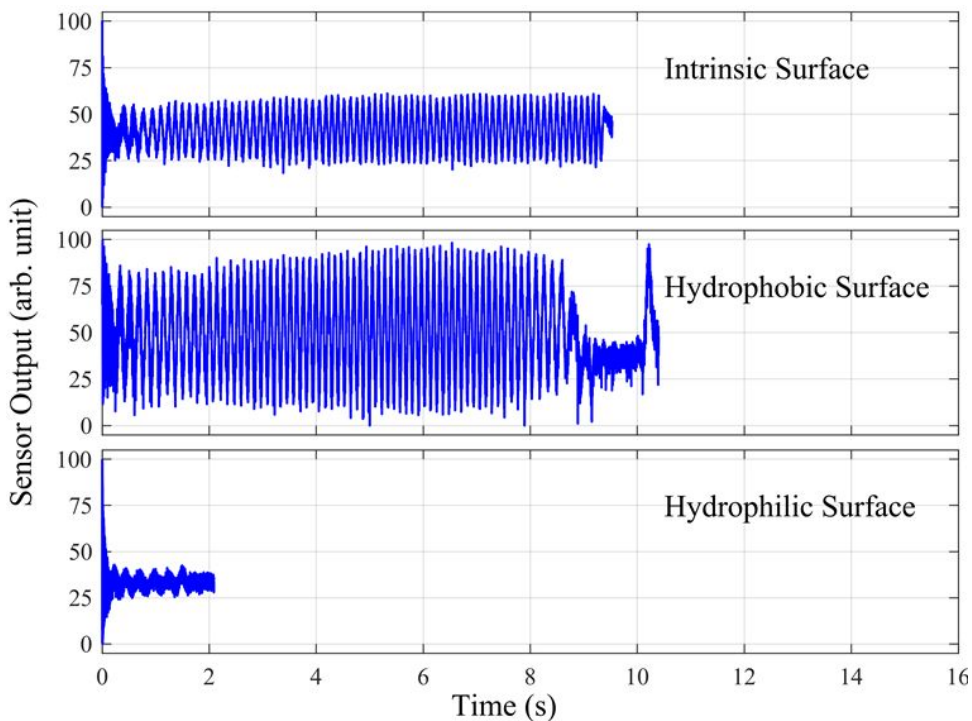

**Figure S1.** An example of time-domain evaporation transient response signals for evaporating droplets of **decane** using an array of three fiber-optic sensors. Each signal corresponds to an evaporation event of a single **decane** droplet from a single surface in the

array of sensor. For comparison, the x-axis is set to a range of 0 to 16 seconds for all evaporation transients, so that response signals of varying durations can be compared.

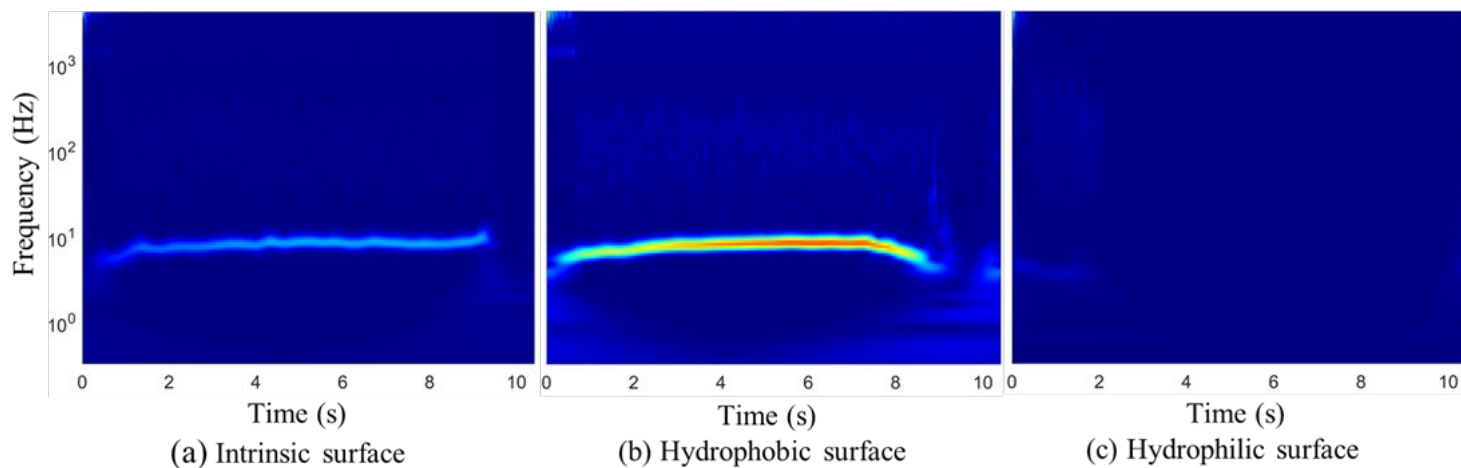

**Figure S2.** Comparison of the scalograms for the evaporation events for **decane** from the “three-dip” test. Response signals from **decane** droplet evaporation on (a) the intrinsic surface, (b) the hydrophobic surface, and (c) the hydrophilic surface for the “three-dip” test are shown.

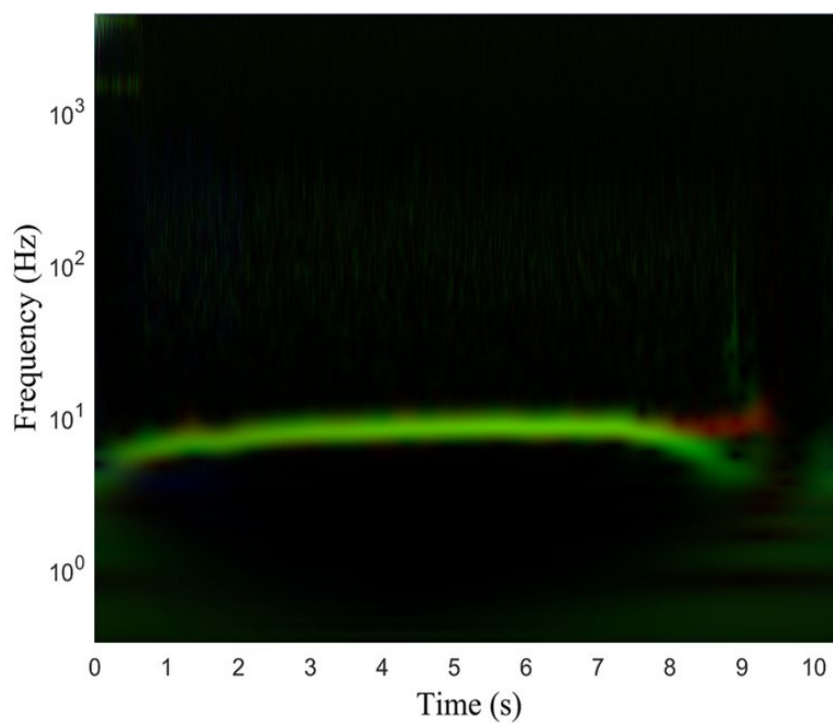

**Figure S3.** The example of a 3-channel image from Dataset-surface-channels displayed as an RGB image, where scalogram images of response signals from a single complete data collection step or “three-dip” test for **decane** are used. Each channel corresponds to the response collected from a droplet evaporation event of **decane** from the differently-treated cleaved optical fiber sensor head surfaces, namely intrinsic (green channel), hydrophobic (red channel), and hydrophilic (blue channel).

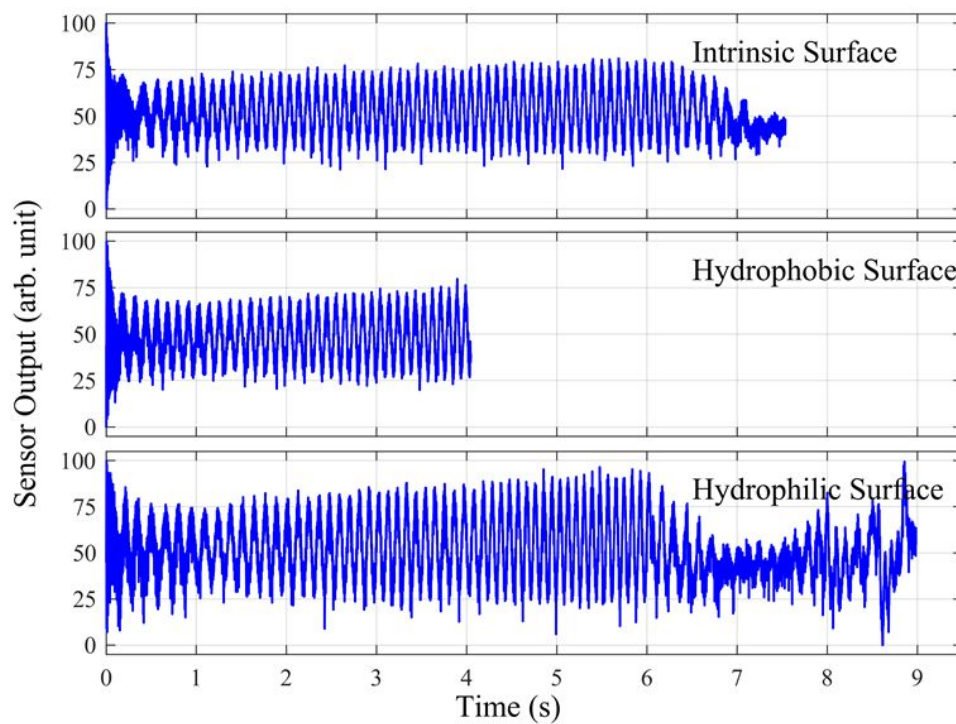

**Figure S4.** An example of time-domain evaporation transient response signals for evaporating droplets of **dimethylformamide** using an array of three fiber-optic sensors. Each signal corresponds to an evaporation event of a single **dimethylformamide** droplet from a single surface in the array of sensor. For comparison, the x-axis is set to a range of 0 to 9.5 seconds for all evaporation transients, so that response signals of varying durations can be compared.

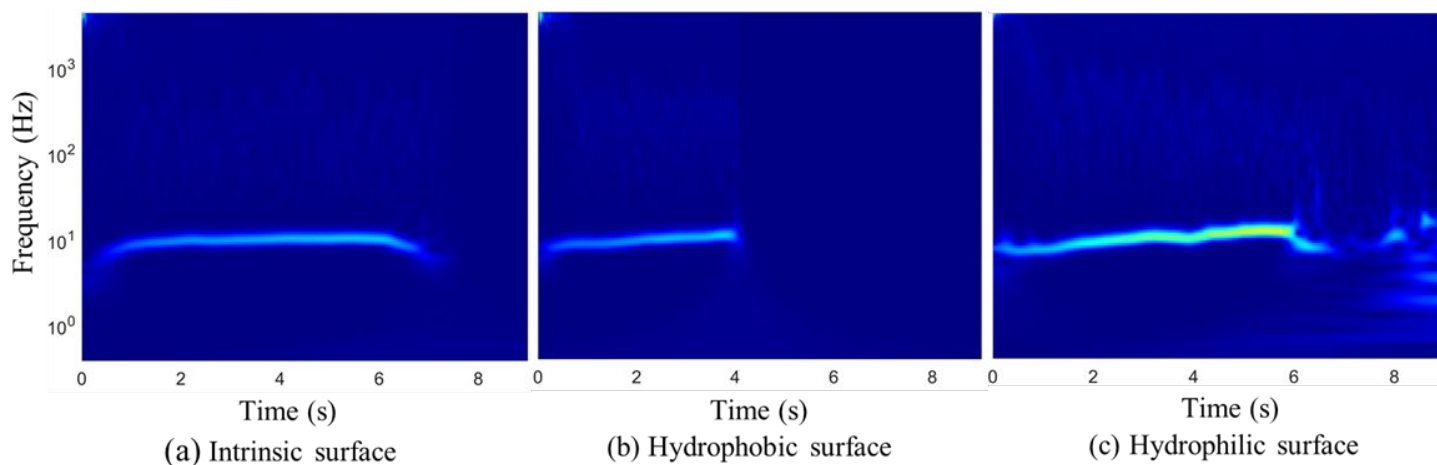

**Figure S5.** Comparison of the scalograms for the evaporation events for **dimethylformamide** from the “three-dip” test. Response signals from **dimethylformamide** droplet evaporation on (a) the intrinsic surface, (b) the hydrophobic surface, and (c) the hydrophilic surface for the “three-dip” test are shown.

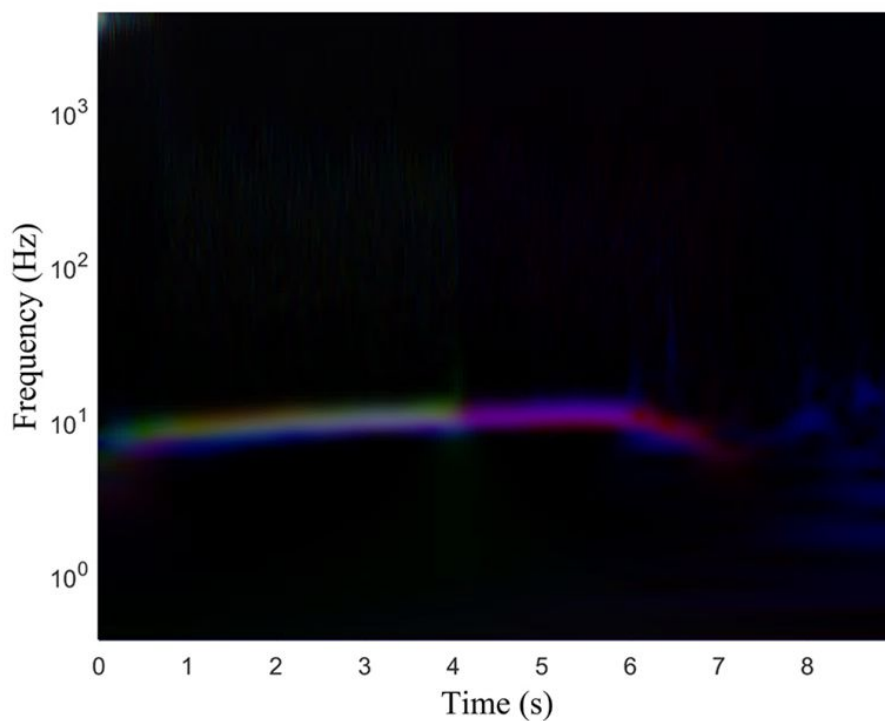

**Figure S6.** The example of a 3-channel image from Dataset-surface-channels displayed as an RGB image, where scalogram images of response signals from a single complete data collection step or “three-dip” test for **dimethylformamide** are used. Each channel corresponds to the response collected from a droplet evaporation event of **dimethylformamide** from the differently-treated cleaved optical fiber sensor head surfaces, namely intrinsic (green channel), hydrophobic (red channel), and hydrophilic (blue channel).

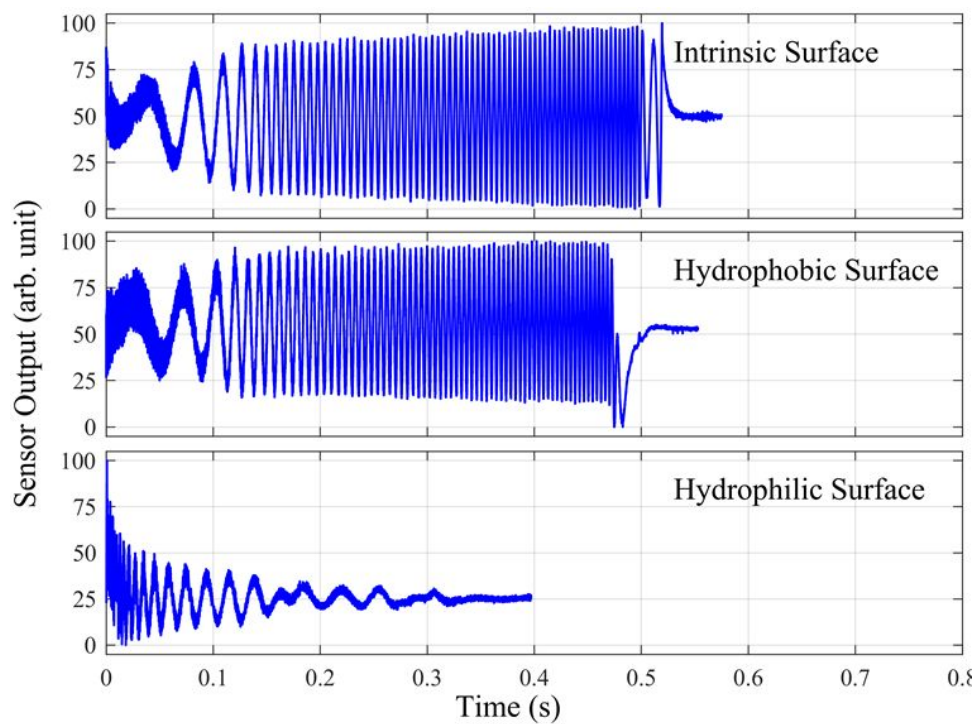

**Figure S7.** An example of time-domain evaporation transient response signals for evaporating droplets of **isooctane** using an array of three fiber-optic sensors. Each signal corresponds to an evaporation event of a single **isooctane** droplet from a single surface in the array of sensor. For comparison, the x-axis is set to a range of 0 to 0.8 seconds for all evaporation transients, so that response signals of varying durations can be compared.

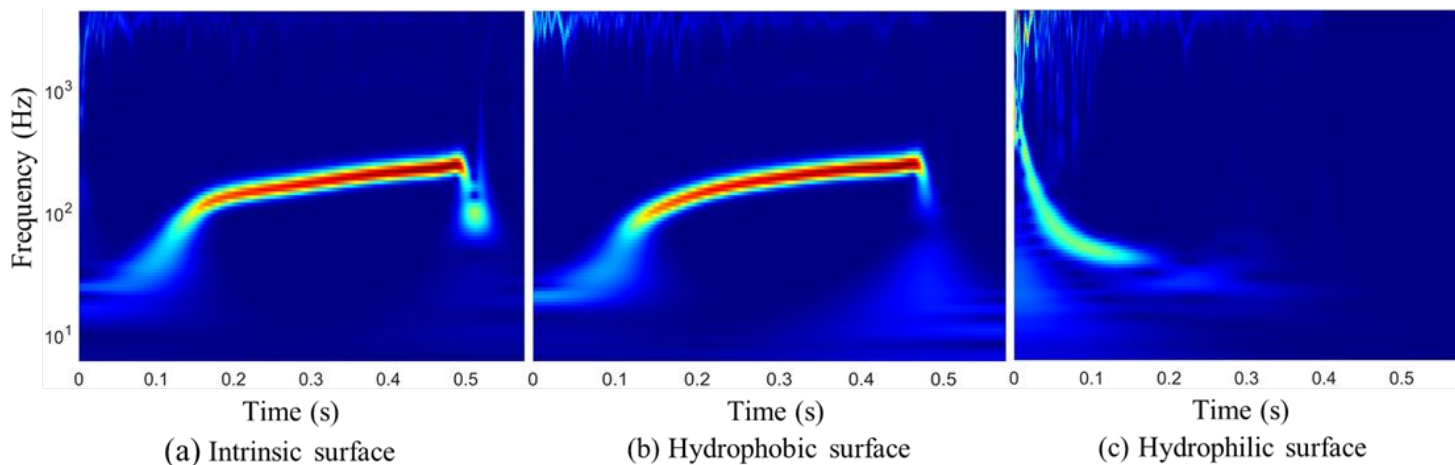

**Figure S8.** Comparison of the scalograms for the evaporation events for **isooctane** from the “three-dip” test. Response signals from **isooctane** droplet evaporation on (a) the intrinsic surface, (b) the hydrophobic surface, and (c) the hydrophilic surface for the “three-dip” test are shown.



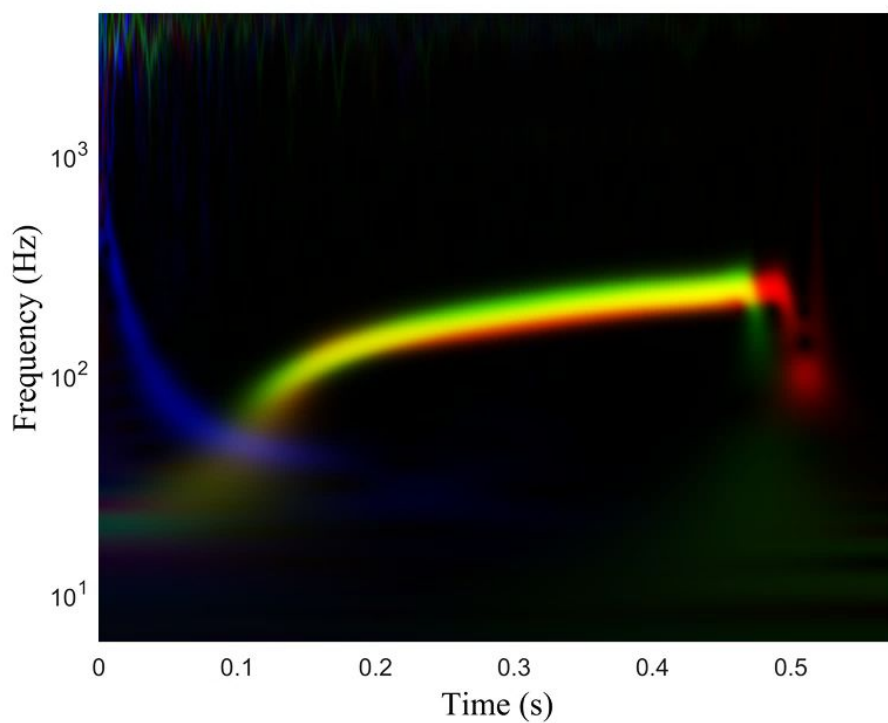

**Figure S9.** The example of a 3-channel image from Dataset-surface-channels displayed as an RGB image, where scalogram images of response signals from a single complete data collection step or “three-dip” test for **isooctane** are used. Each channel corresponds to the response collected from a droplet evaporation event of **isooctane** from the differently-treated cleaved optical fiber sensor head surfaces, namely intrinsic (green channel), hydrophobic (red channel), and hydrophilic (blue channel).

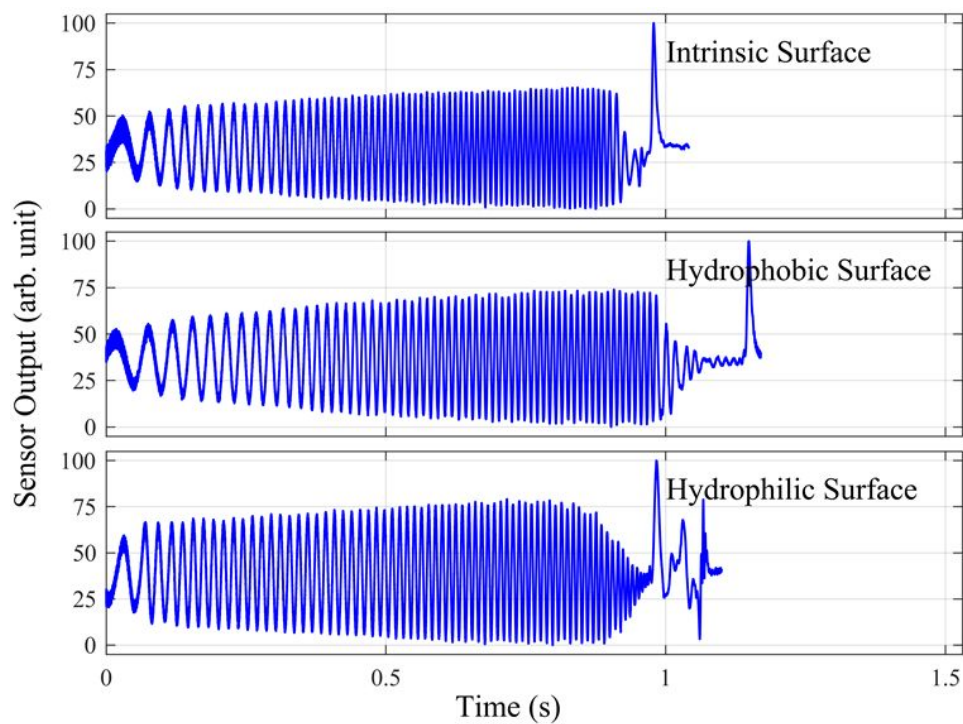

**Figure S10.** An example of time-domain evaporation transient response signals for evaporating droplets of **2-propanol** using an array of three fiber-optic sensors. Each signal corresponds to an evaporation event of a single **2-propanol** droplet from a single surface in the array of sensor. For comparison, the x-axis is set to a range of 0 to 1.5 seconds for all evaporation transients, so that response signals of varying durations can be compared.

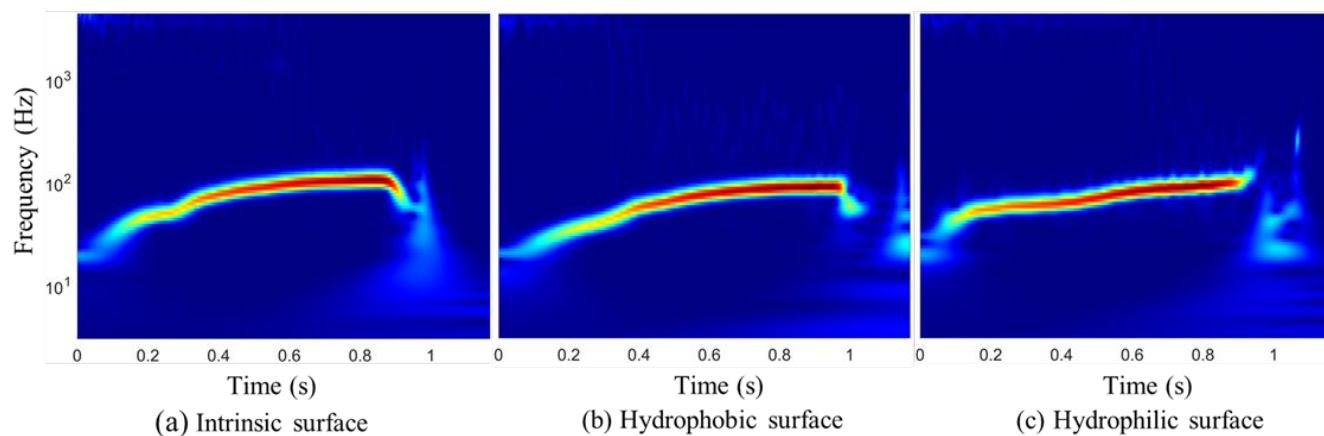

**Figure S11.** Comparison of the scalograms for the evaporation events for **2-propanol** from the “three-dip” test. Response signals from **2-propanol** droplet evaporation on (a) the intrinsic surface, (b) the hydrophobic surface, and (c) the hydrophilic surface for the “three-dip” test are shown.

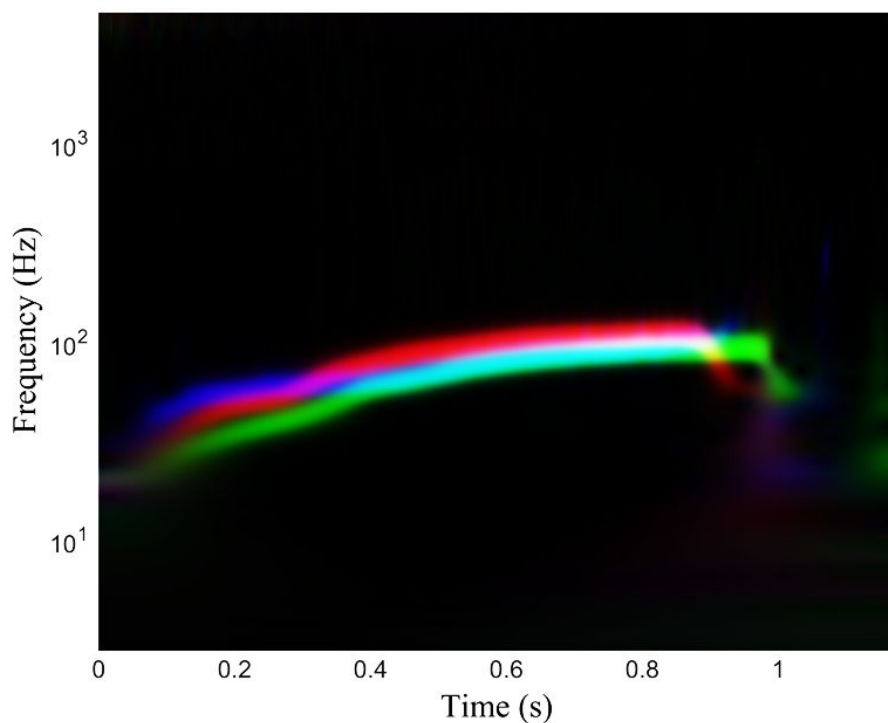

**Figure S12.** The example of a 3-channel image from Dataset-surface-channels displayed as an RGB image, where scalogram images of response signals from a single complete data collection step or “three-dip” test for **2-propanol** are used. Each channel corresponds to the response collected from a droplet evaporation event of **2-propanol** from the differently-treated cleaved optical fiber sensor head surfaces, namely intrinsic (green channel), hydrophobic (red channel), and hydrophilic (blue channel).

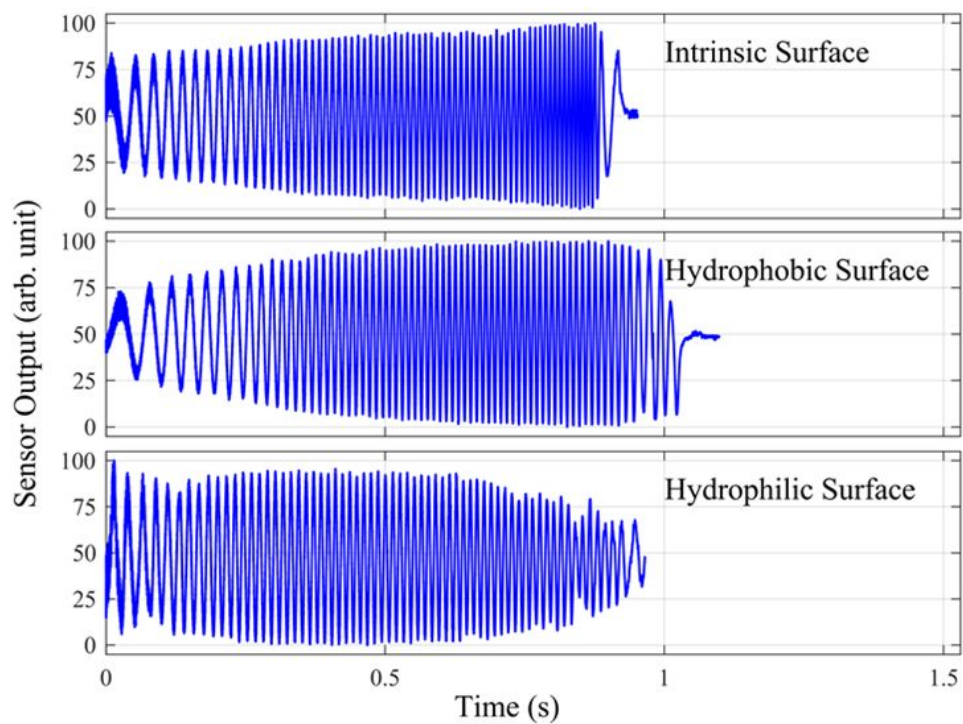

**Figure S13.** An example of time-domain evaporation transient response signals for evaporating droplets of **ethanol** using an array of three fiber-optic sensors. Each signal corresponds to an evaporation event of a single **ethanol** droplet from a single surface in the array of sensor. For comparison, the x-axis is set to a range of 0 to 1.5 seconds for all evaporation transients, so that response signals of varying durations can be compared.

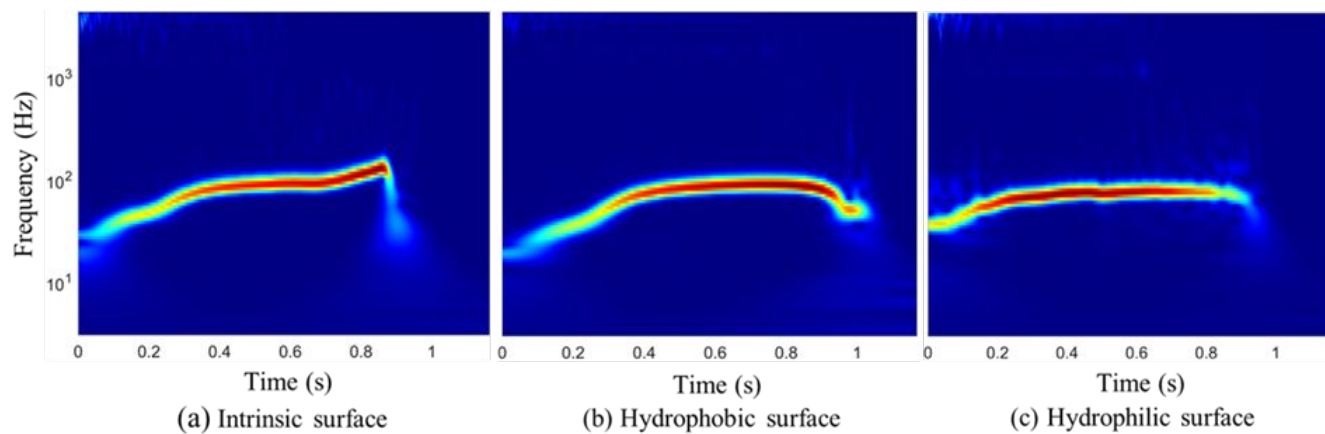

**Figure S14.** Comparison of the scalograms for the evaporation events for **ethanol** from the “three-dip” test. Response signals from **ethanol** droplet evaporation on (a) the intrinsic surface, (b) the hydrophobic surface, and (c) the hydrophilic surface for the “three-dip” test are shown.

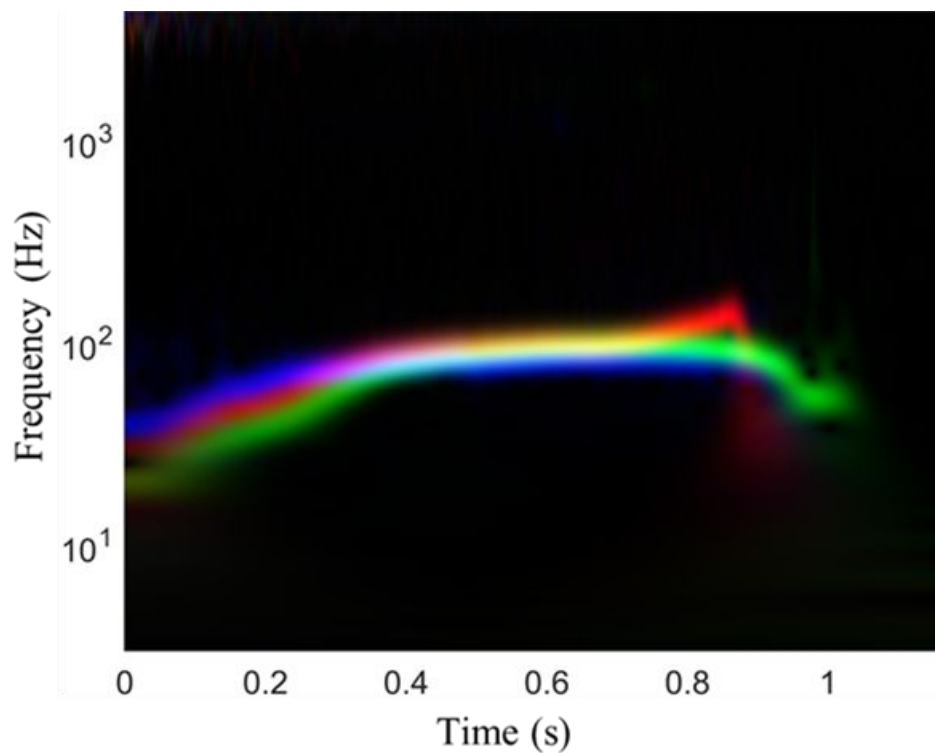

**Figure S15.** The example of a 3-channel image from Dataset-surface-channels displayed as an RGB image, where scalogram images of response signals from a single complete data collection step or “three-dip” test for **ethanol** are used. Each channel corresponds to the response collected from a droplet evaporation event of **ethanol** from the differently-treated cleaved optical fiber sensor head surfaces, namely intrinsic (green channel), hydrophobic (red channel), and hydrophilic (blue channel).

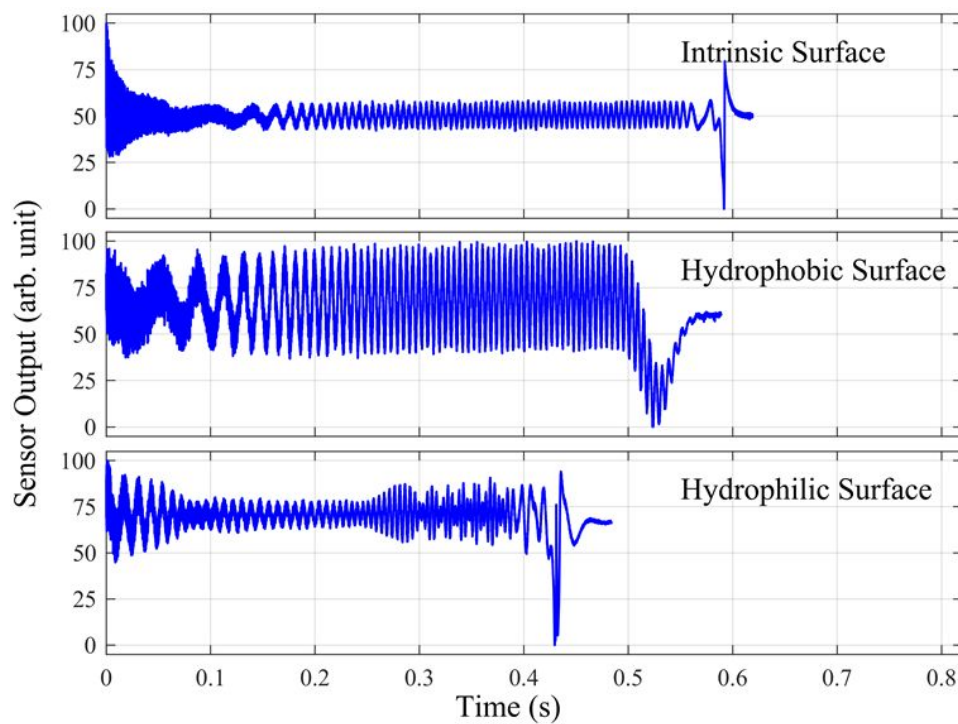

**Figure S16.** An example of time-domain evaporation transient response signals for evaporating droplets of **trichloroethylene** using an array of three fiber-optic sensors. Each signal corresponds to an evaporation event of a single **trichloroethylene** droplet from a single surface in the array of sensor. For comparison, the x-axis is set to a range of 0 to 0.8 seconds for all evaporation transients, so that response signals of varying durations can be compared.



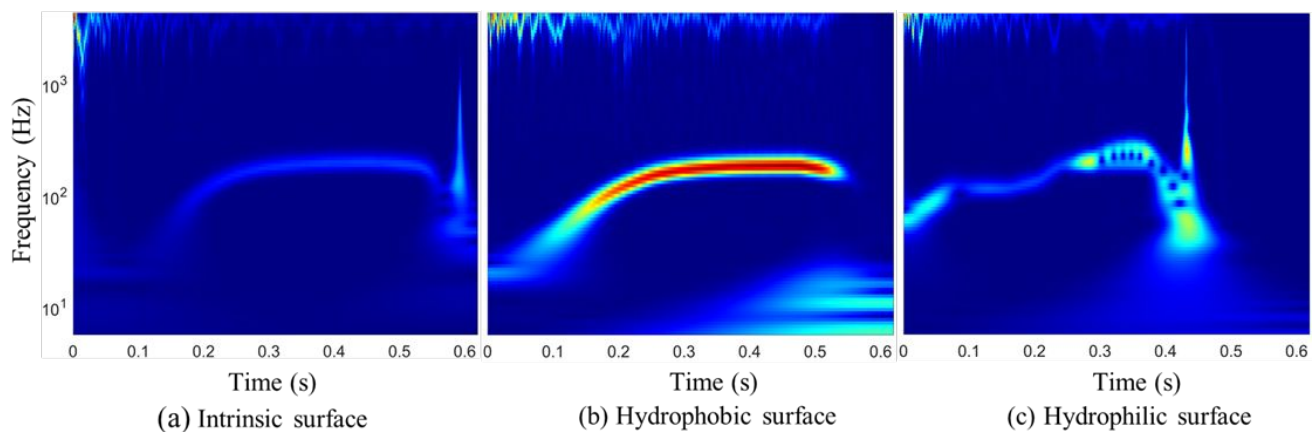

**Figure S17.** Comparison of the scalograms for the evaporation events for **trichloroethylene** from the “three-dip” test. Response signals from **trichloroethylene** droplet evaporation on (a) the intrinsic surface, (b) the hydrophobic surface, and (c) the hydrophilic surface for the “three-dip” test are shown.

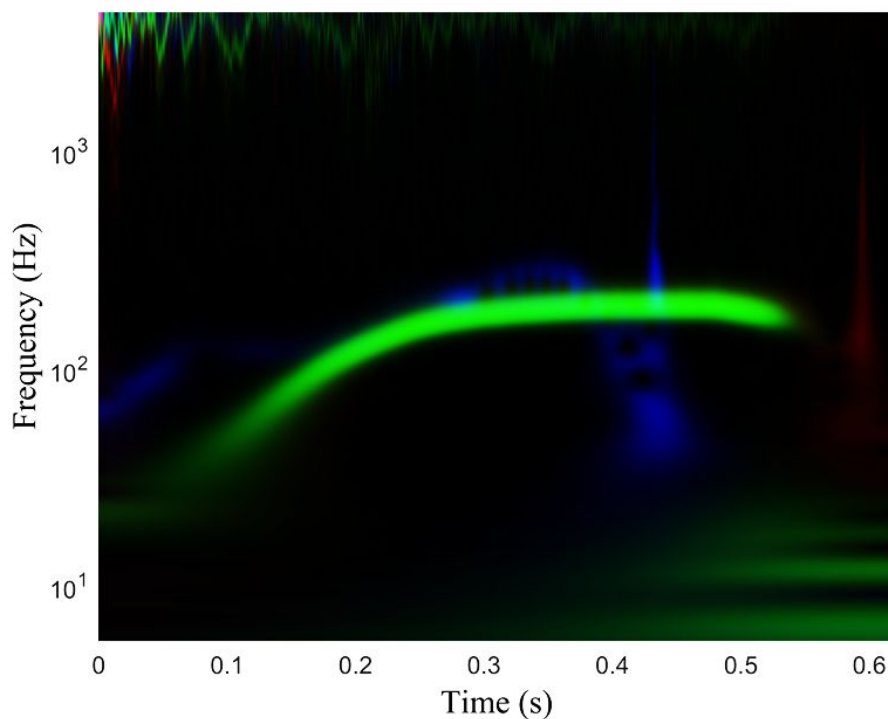

**Figure S18.** The example of a 3-channel image from Dataset-surface-channels displayed as an RGB image, where scalogram images of response signals from a single complete data collection step or “three-dip” test for **trichloroethylene** are used. Each channel corresponds to the response collected from a droplet evaporation event of **trichloroethylene** from the differently-treated cleaved optical fiber sensor head surfaces, namely intrinsic (green channel), hydrophobic (red channel), and hydrophilic (blue channel).

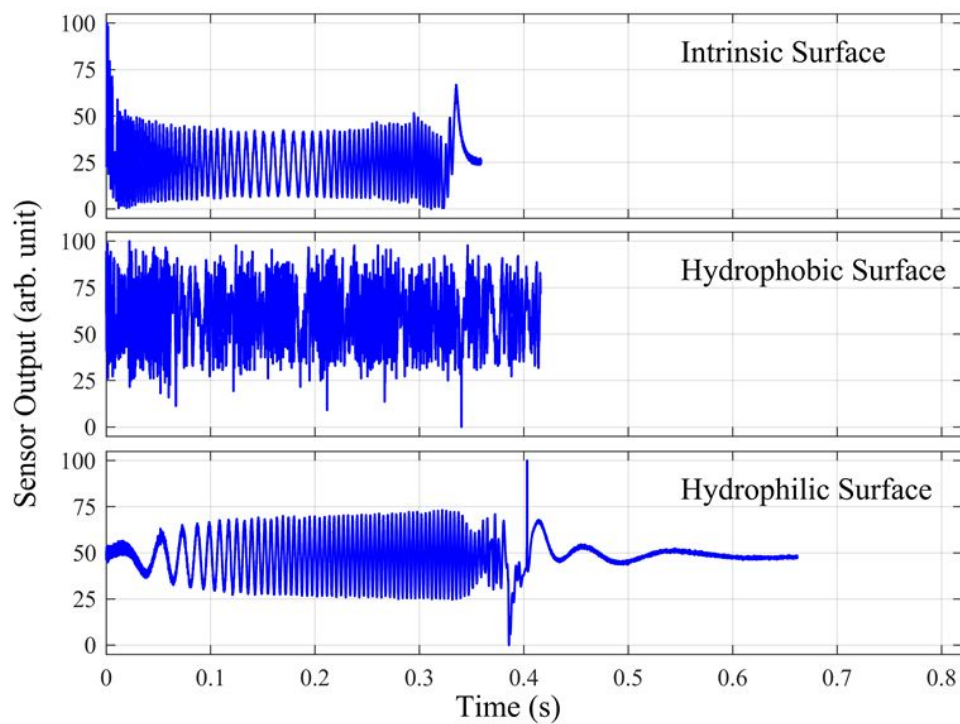

**Figure S19.** An example of time-domain evaporation transient response signals for evaporating droplets of **ethyl acetate** using an array of three fiber-optic sensors. Each signal corresponds to an evaporation event of a single **ethyl acetate** droplet from a single surface in the array of sensor. For comparison, the x-axis is set to a range of 0 to 0.8 seconds for all evaporation transients, so that response signals of varying durations can be compared.

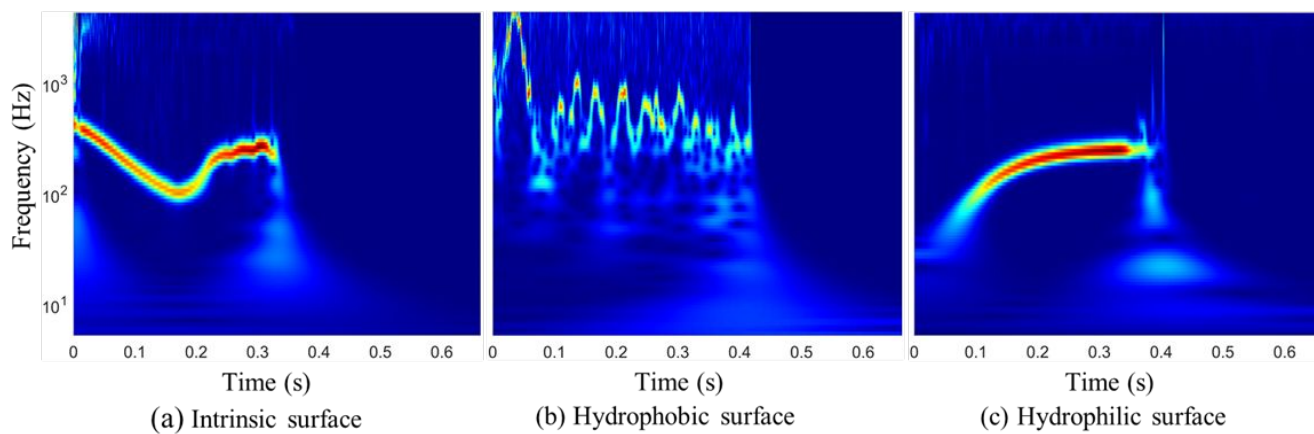

**Figure S20.** Comparison of the scalograms for the evaporation events for **ethyl acetate** from the “three-dip” test. Response signals from **ethyl acetate** droplet evaporation on (a) the intrinsic surface, (b) the hydrophobic surface, and (c) the hydrophilic surface for the “three-dip” test are shown.

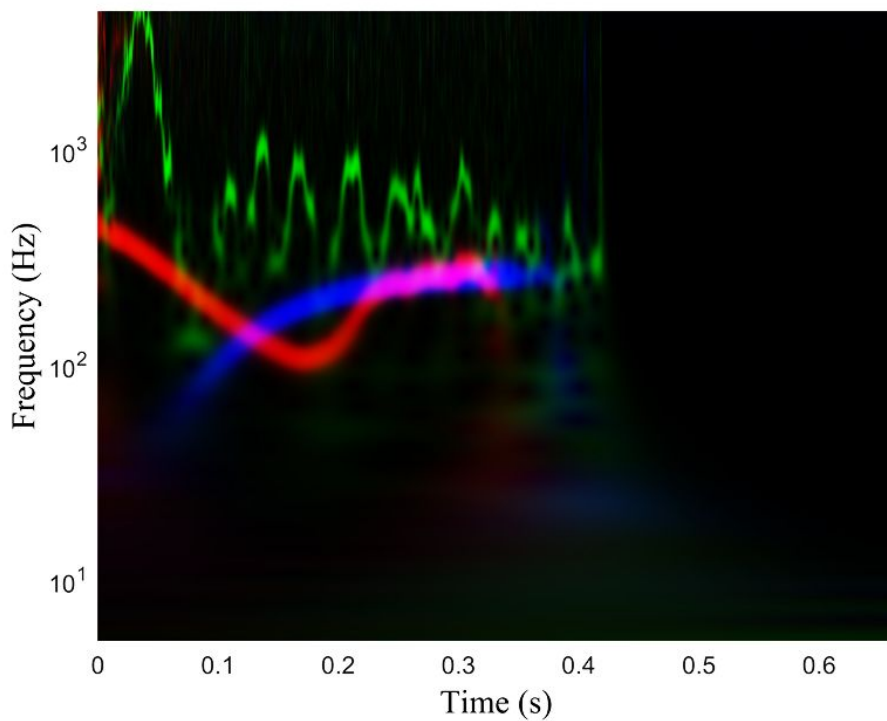

**Figure S21.** The example of a 3-channel image from Dataset-surface-channels displayed as an RGB image, where scalogram images of response signals from a single complete data collection step or “three-dip” test for **ethyl acetate** are used. Each channel corresponds to the response collected from a droplet evaporation event of **ethyl acetate** from the differently-treated cleaved optical fiber sensor head surfaces, namely intrinsic (green channel), hydrophobic (red channel), and hydrophilic (blue channel).

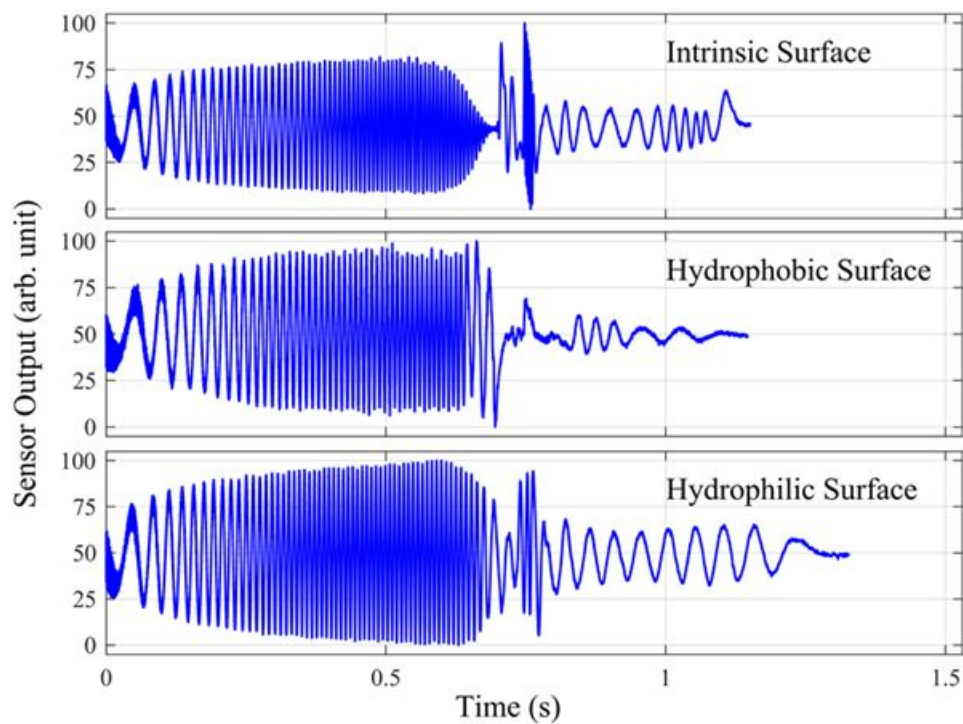

**Figure S22.** An example of time-domain evaporation transient response signals for evaporating droplets of **methanol** using an array of three fiber-optic sensors. Each signal corresponds to an evaporation event of a single **methanol** droplet from a single surface in the array of sensor. For comparison, the x-axis is set to a range of 0 to 1.5 seconds for all evaporation transients, so that response signals of varying durations can be compared.

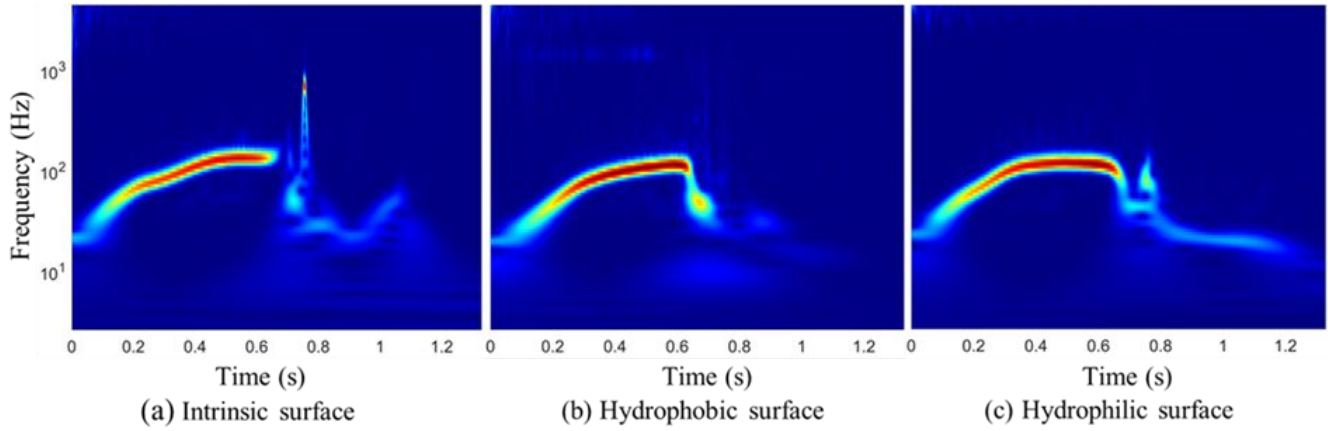

**Figure S23.** Comparison of the scalograms for the evaporation events for **methanol** from the “three-dip” test. Response signals from **methanol** droplet evaporation on (a) the intrinsic surface, (b) the hydrophobic surface, and (c) the hydrophilic surface for the “three-dip” test are shown.

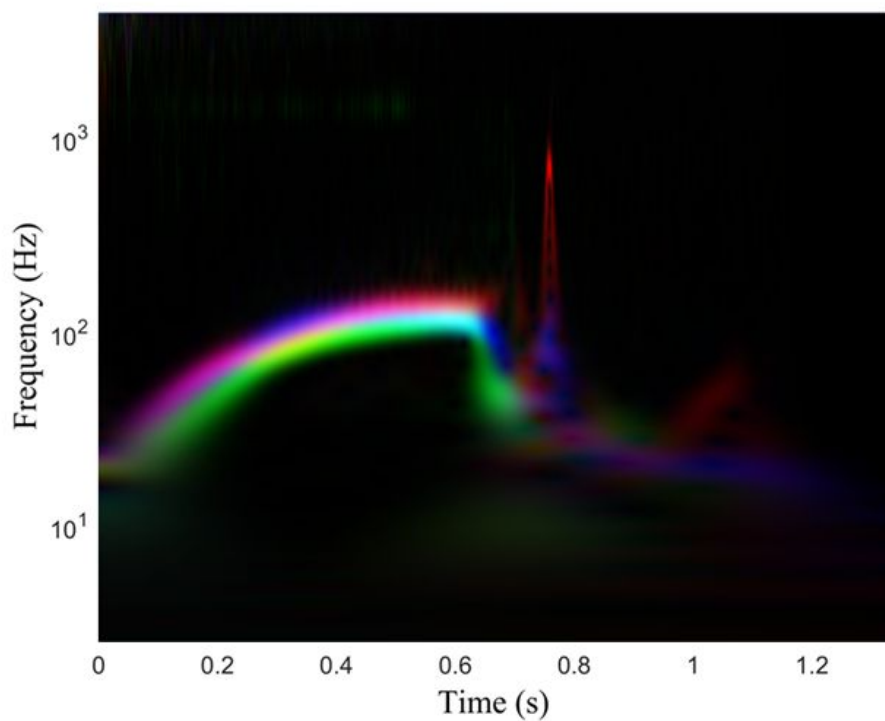

**Figure S24.** The example of a 3-channel image from Dataset-surface-channels displayed as an RGB image, where scalogram images of response signals from a single complete data collection step or “three-dip” test for methanol are used. Each channel corresponds to the response collected from a droplet evaporation event of methanol from the differently-treated cleaved optical fiber sensor head surfaces, namely intrinsic (green channel), hydrophobic (red channel), and hydrophilic (blue channel).



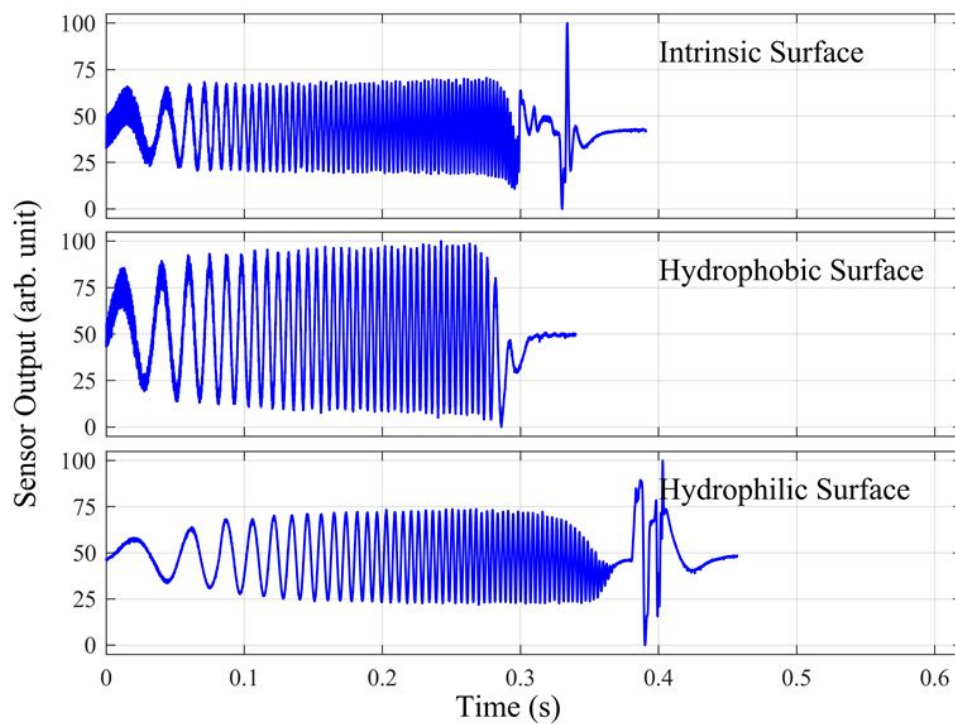

**Figure S25.** An example of time-domain evaporation transient response signals for evaporating droplets of **acetone** using an array of three fiber-optic sensors. Each signal corresponds to an evaporation event of a single **acetone** droplet from a single surface in the array of sensor. For comparison, the x-axis is set to a range of 0 to 0.6 seconds for all evaporation transients, so that response signals of varying durations can be compared.

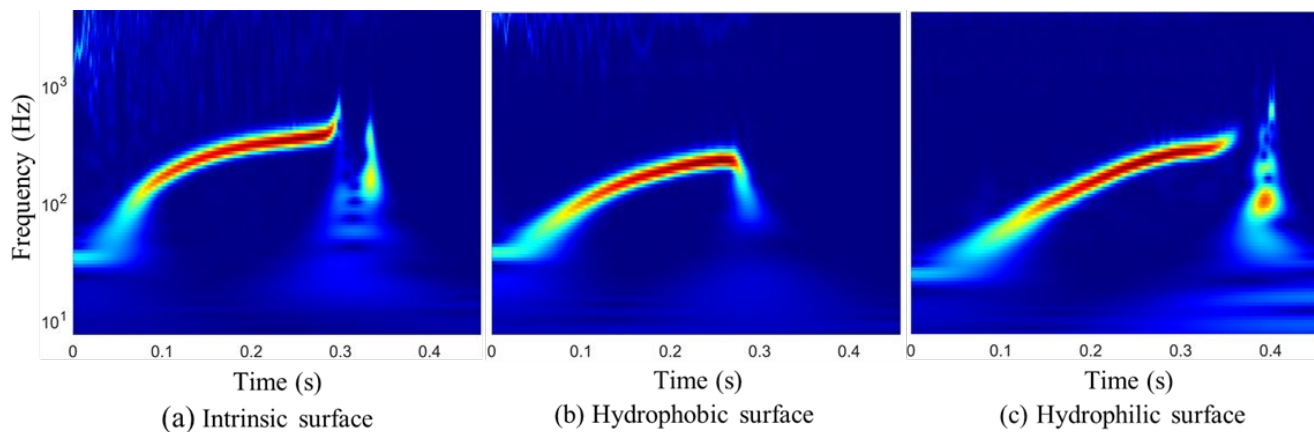

**Figure S26.** Comparison of the scalograms for the evaporation events for **acetone** from the “three-dip” test. Response signals from **acetone** droplet evaporation on (a) the intrinsic surface, (b) the hydrophobic surface, and (c) the hydrophilic surface for the “three-dip” test are shown.

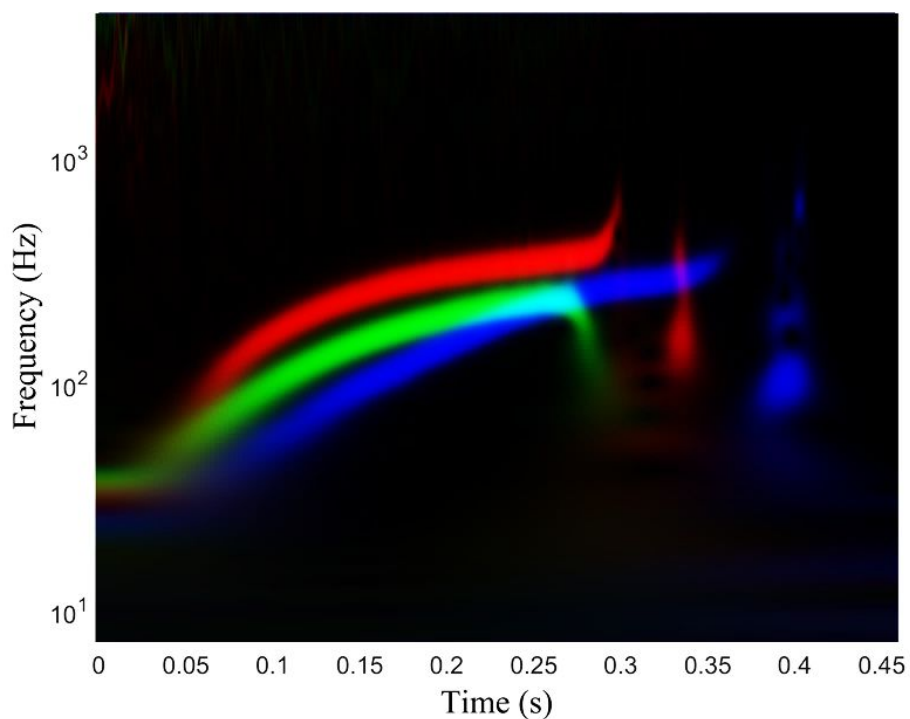

**Figure S27.** The example of a 3-channel image from Dataset-surface-channels displayed as an RGB image, where scalogram images of response signals from a single complete data collection step or “three-dip” test for **acetone** are used. Each channel corresponds to the response collected from a droplet evaporation event of **acetone** from the differently-treated cleaved optical fiber sensor head surfaces, namely intrinsic (green channel), hydrophobic (red channel), and hydrophilic (blue channel).



**Figure S28.** An example of time-domain evaporation transient response signals for evaporating droplets of **dichloromethane (DCM)** using an array of three fiber-optic sensors. Each signal corresponds to an evaporation event of a single **dichloromethane (DCM)** droplet from a single surface in the array of sensor. For comparison, the x-axis is set to a range of 0 to 0.8 seconds for all evaporation transients, so that response signals of varying durations can be compared.

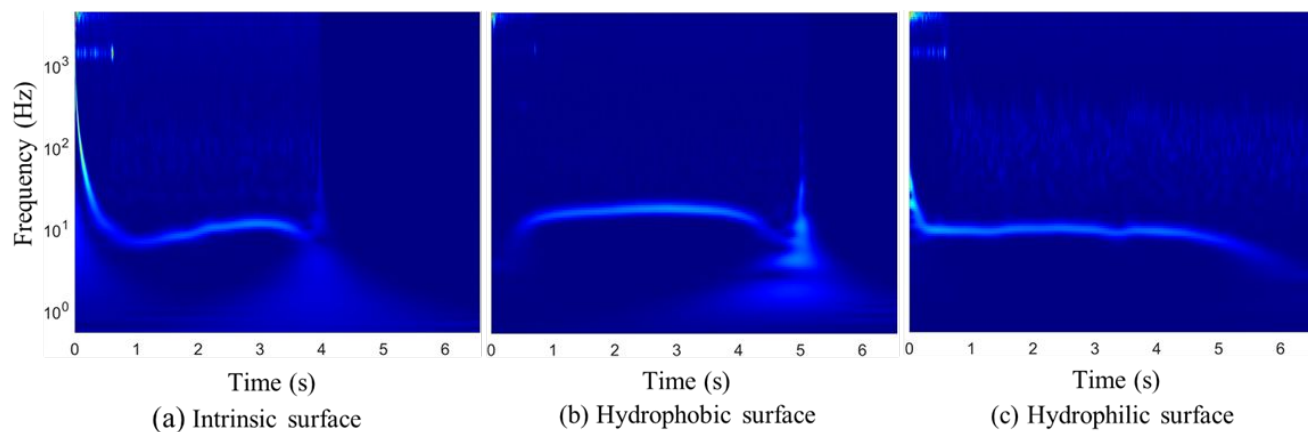

**Figure S29.** Comparison of the scalograms for the evaporation events for **dichloromethane (DCM)** from the “three-dip” test. Response signals from **dichloromethane (DCM)** droplet evaporation on (a) the intrinsic surface, (b) the hydrophobic surface, and (c) the hydrophilic surface for the “three-dip” test are shown.

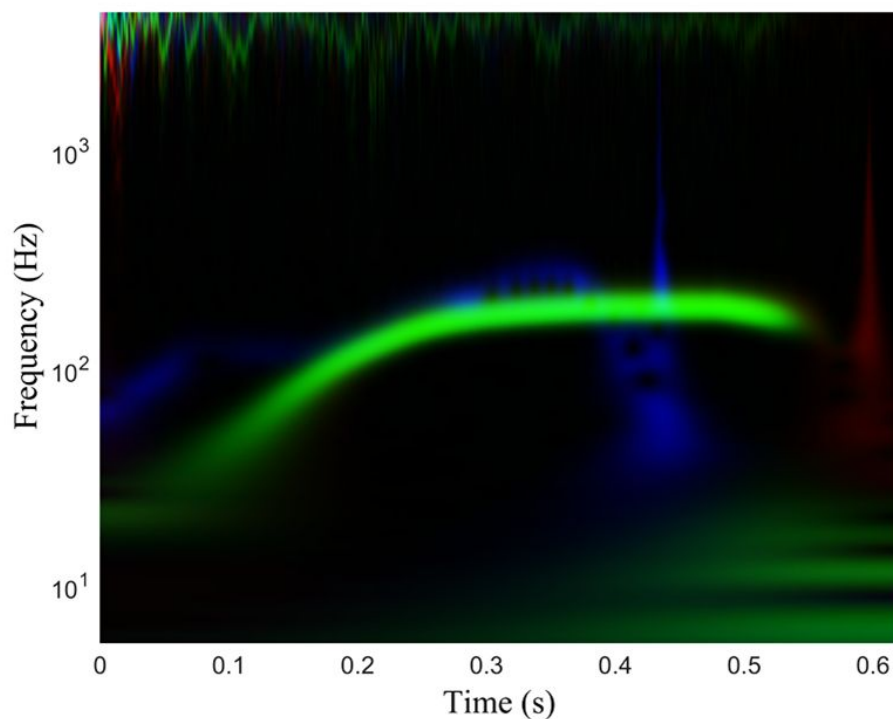

**Figure S30.** The example of a 3-channel image from Dataset-surface-channels displayed as an RGB image, where scalogram images of response signals from a single complete data collection step or “three-dip” test for **dichloromethane (DCM)** are used. Each channel corresponds to the response collected from a droplet evaporation event of **dichloromethane (DCM)** from the differently-treated cleaved optical fiber sensor head surfaces, namely intrinsic (green channel), hydrophobic (red channel), and hydrophilic (blue channel).

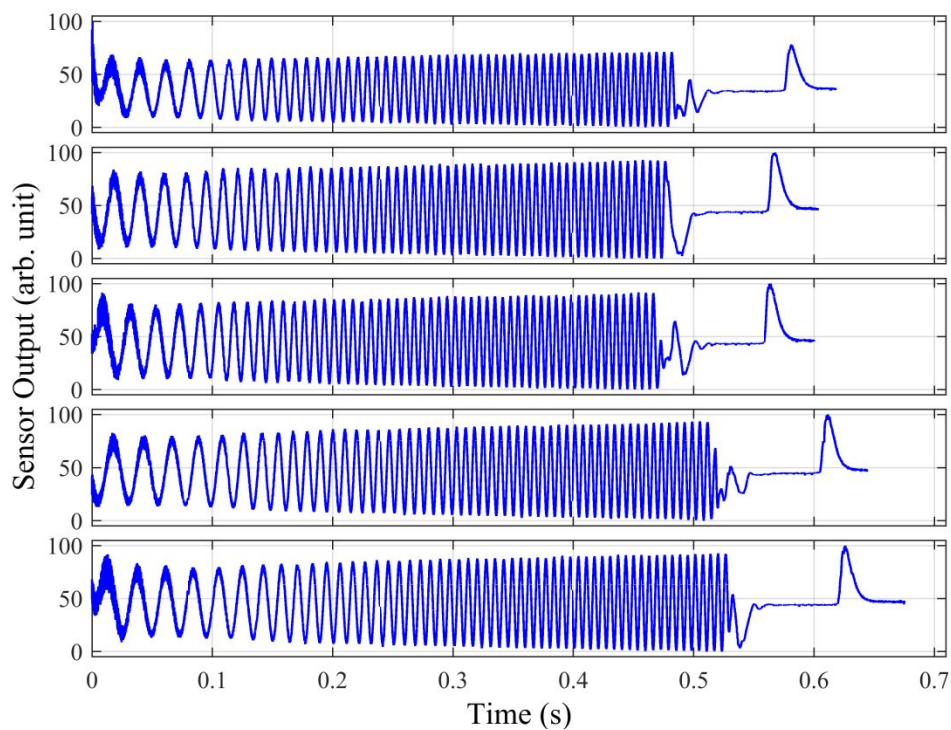

**Figure S31.** Examples of time-domain evaporation transient response signals for droplet evaporation experiments using **acetonitrile on an innate (untreated cleaved tip sensor)** tip sensor. The similarity in transient responses show that the experiments were repeatable and reproducible.

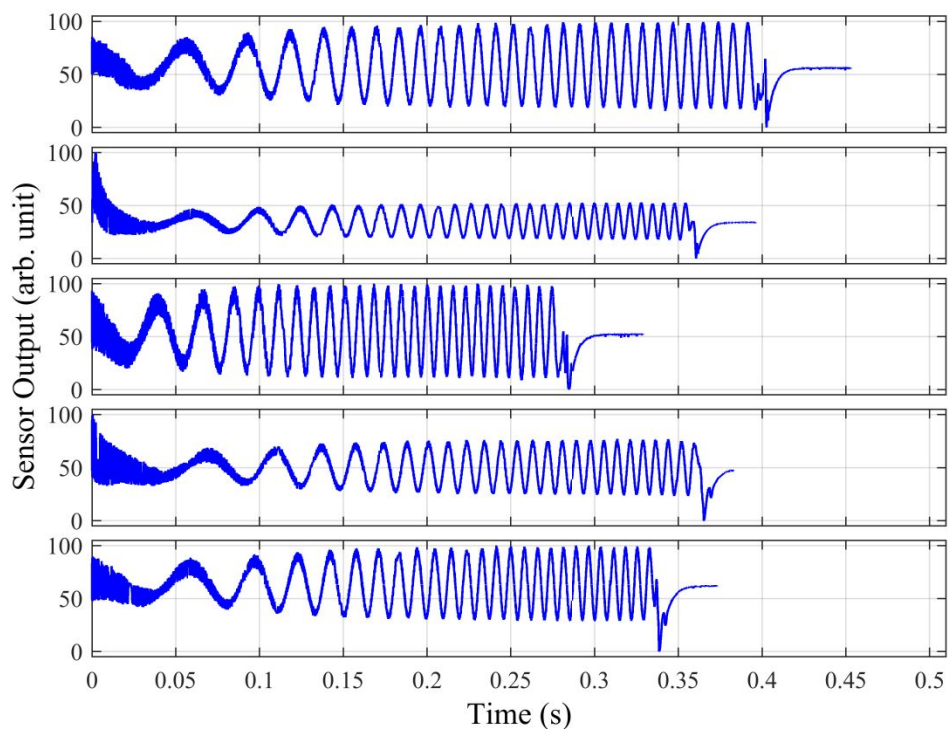

**Figure S32.** Examples of time-domain evaporation transient response signals for droplet evaporation experiments using **acetonitrile** on a **hydrophobic-surface** tip sensor. The similarity in transient responses show that the experiments were repeatable and reproducible.



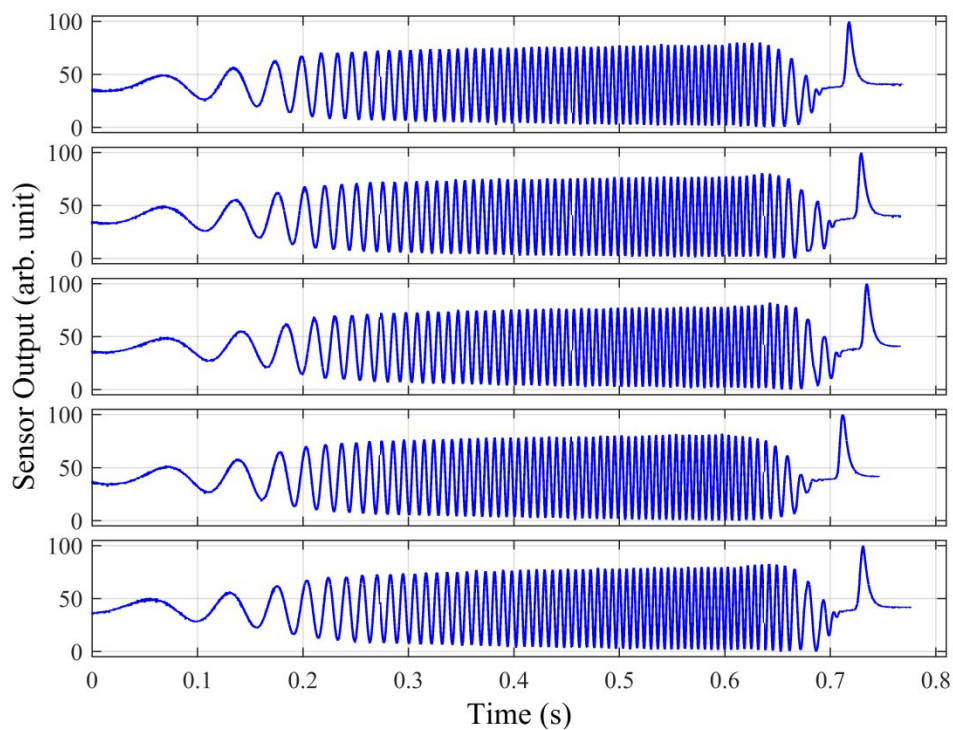

**Figure S33.** Examples of time-domain evaporation transient response signals for droplet evaporation experiments using **acetonitrile** on a **hydrophilic-surface** tip sensor. The similarity in transient responses show that the experiments were repeatable and reproducible.
